# Supplementary material for: A low temperature processed fused-ring electron transport material for efficient planar perovskite solar cells
Source: Royal Society of Chemistry journal article supplement (doi:10.1039/c7ta09543k), 2017-01-01
Supplement: c7ta09543k1.pdf [file c7ta09543k1.pdf]

Electronic Supplementary Information

**Low temperature processed fused-ring electron transport material for efficient planar perovskite solar cells**

Mingyu Zhang,<sup>a</sup> Jingshuai Zhu,<sup>a</sup> Kuan Liu,<sup>a</sup> Guanhaojie Zheng,<sup>a</sup> Guanchao Zhao,<sup>b</sup> Liwei Li,<sup>b</sup> Yuan Meng,<sup>b</sup> Ted Guo,<sup>b</sup> Huanping Zhou\*<sup>a</sup> and Xiaowei Zhan\*<sup>a</sup>

<sup>a</sup> *Department of Materials Science and Engineering, College of Engineering, Peking University, Beijing 100871, P. R. China. E-mail: xwzhan@pku.edu.cn, happy\_zhou@pku.edu.cn*

<sup>b</sup> *ENN Solar Energy Co., Ltd, Huaxiang Road 106, Langfang, Hebei 065001, P. R. China*

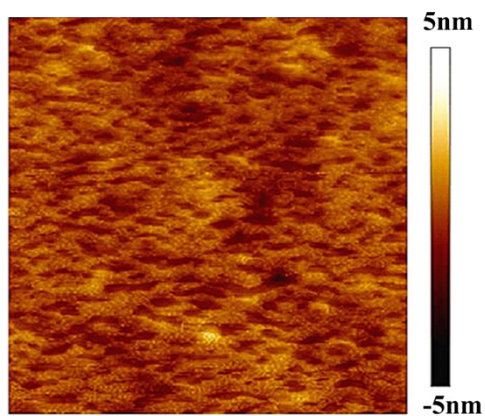

**Fig. S1** AFM image of IDIC layer ( $1\ \mu\text{m} \times 1\ \mu\text{m}$ ).

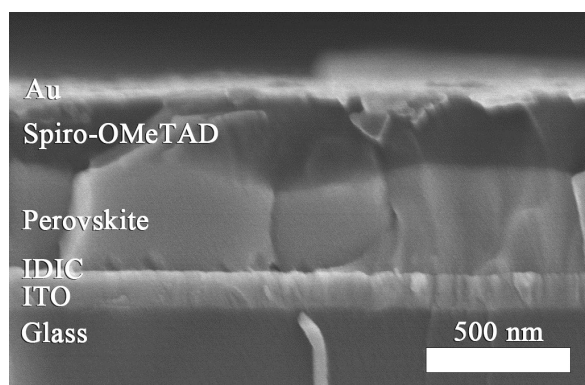

**Fig. S2** SEM image of cross-sectional structure of PSCs.

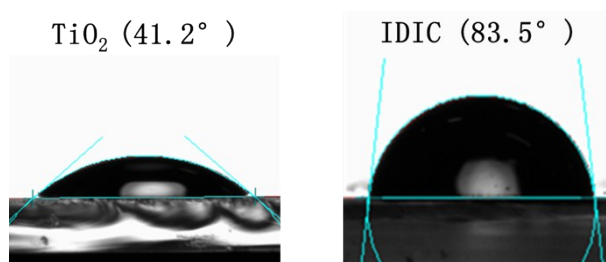

**Fig. S3** Water contact angles of different ETL films on glass substrate.

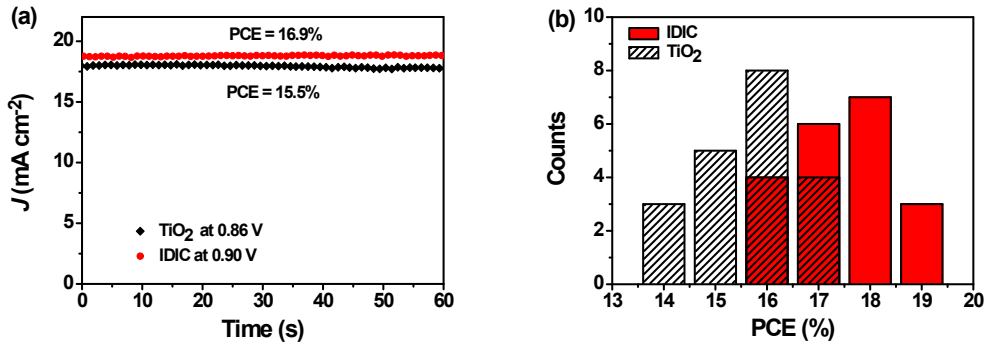

**Fig. S4** (a) Steady-state measurement of current and PCE of PSCs; (b) histogram of efficiencies based on 20 devices.

**Table S1** Photovoltaic parameters of the modified devices based on IDIC with different concentrations.

| IDIC (mg mL <sup>-1</sup> ) | $J_{SC}$ (mA cm <sup>-2</sup> ) | $V_{OC}$ (V) | FF (%) | PCE (%) |
|-----------------------------|---------------------------------|--------------|--------|---------|
| 2                           | 22.4                            | 1.06         | 72.8   | 17.3    |
| 4                           | 23.0                            | 1.06         | 76.3   | 18.5    |
| 6                           | 22.2                            | 1.06         | 72.1   | 16.9    |
| 8                           | 21.7                            | 1.05         | 70.8   | 16.1    |
